# Supplementary material for: PAG/Cbp suppression reveals a contribution of CTLA-4 to setting the activation threshold in T cells
Source: PubMed Central journal article supplement (PMC3763844; doi:10.1186/1478-811x-11-28), 2013-04-19

**Figure S6**

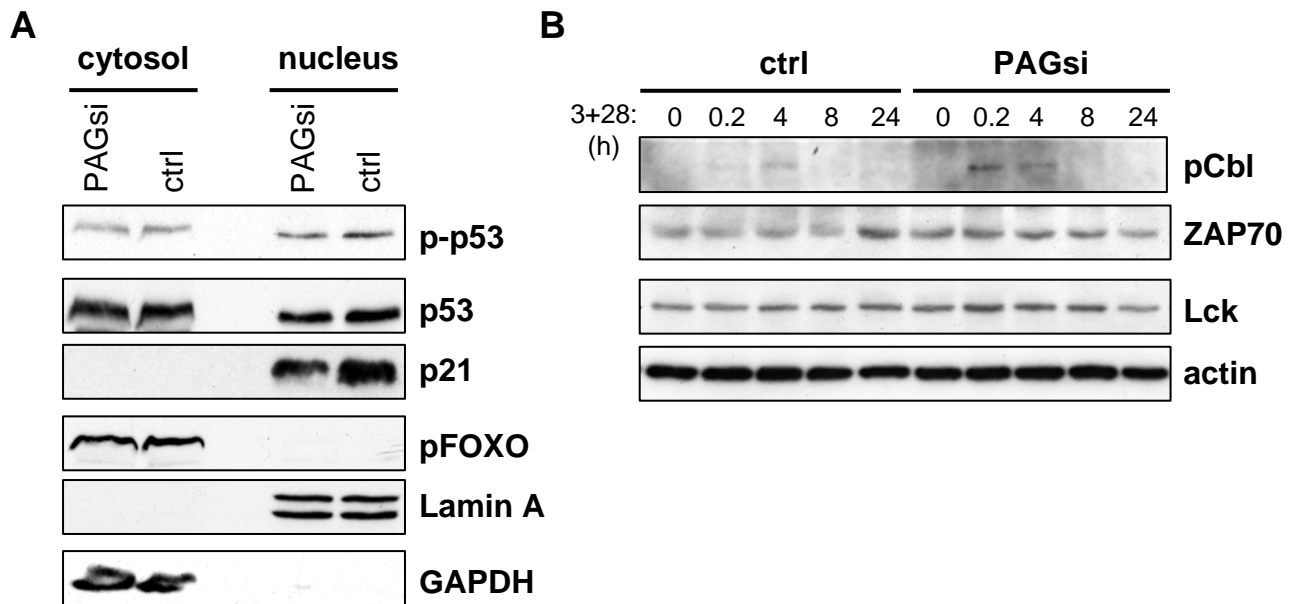

Supplement: 1478-811X-11-28-S5.pdf [file 1478-811X-11-28-S5.pdf]
